# Supplementary material
Source: PubMed Central journal article supplement (PMC3657809)
Supplement: 1301022110_pnas.201301022SI.pdf [file 1301022110_pnas.201301022SI.pdf]

# Supporting Information

Liu et al. 10.1073/pnas.1301022110

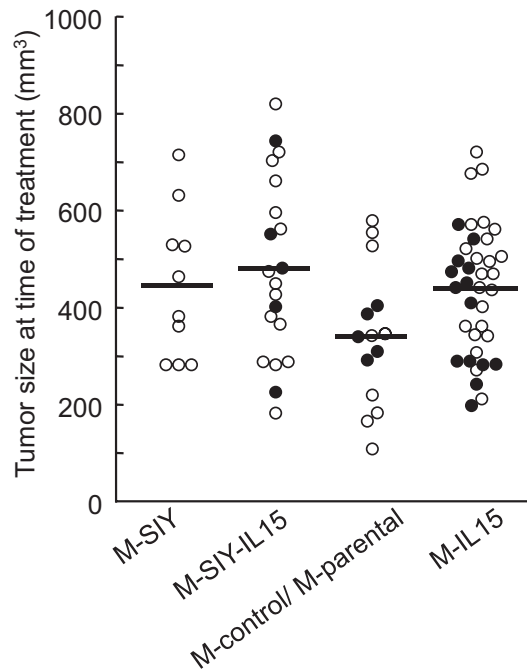

**Fig. S1.** Similar sizes of tumors at time of treatment. Sizes of mesenchymal fibrosarcoma tumors (MC57) reported in this study at the time of treatment with SIY- $K^b$  specific 2C (white) or OVA- $K^b$  specific OT-1 (black) T cells (day 13–15). Lines denote averages for each cell line.

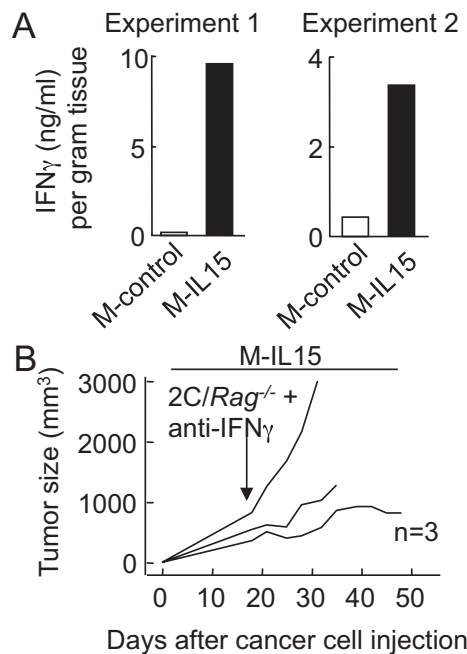

**Fig. S2.** IFN- $\gamma$  is required for tumor eradication, and IFN- $\gamma$  production in tumor tissue increases in the presence of IL-15. (A)  $Rag^{-/-}\gamma C^{-/-}$  mice were injected s.c. with MC57 cells expressing the empty ECFP vector (M-control; white bars) or MC57 cells expressing IL-15 (M-IL15; black bars). IFN- $\gamma$  production in homogenized tissue of M-control or M-IL15 tumors at 10 d after 2C/ $Rag^{-/-}$  T-cell treatment was determined by ELISA. Two individual experiments using single mice are shown. (B)  $Rag^{-/-}\gamma C^{-/-}$  mice were injected s.c. with M-IL15 cells, followed by 2C/ $Rag^{-/-}$  splenocytes i.v. IFN- $\gamma$  was blocked by administration of anti-IFN- $\gamma$  antibody. Failed rejection was significant compared with treatment of M-IL15 with 2C/ $Rag^{-/-}$  ( $P = 0.018$ ) (Fig. 3).

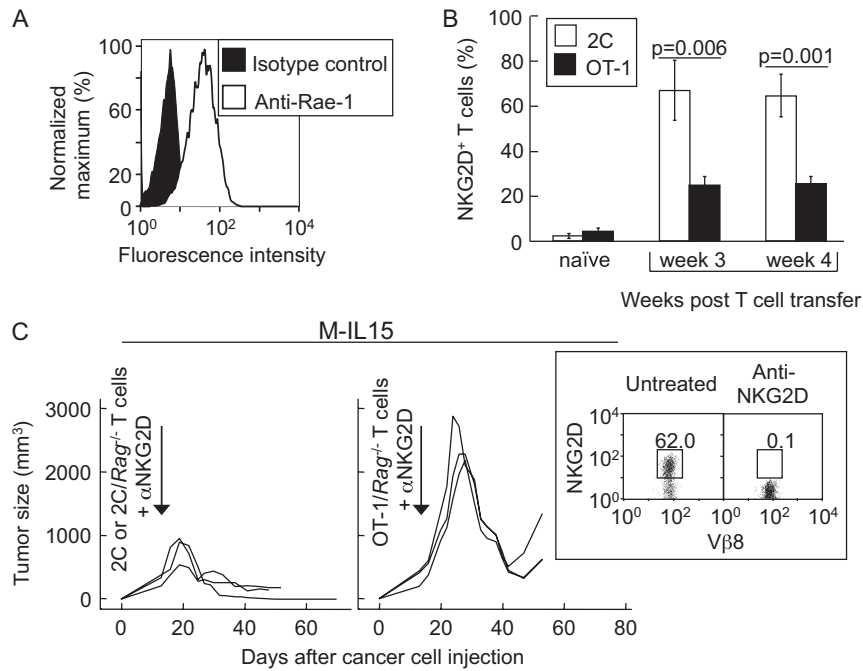

**Fig. 53.** Despite high NKG2D expression on 2C T cells, NKG2D is not required for rejection of M-IL15 tumors. (A) MC57 cells were analyzed by flow cytometry for RNA export 1 (Rae-1) expression. (B) Peripheral blood specimens were obtained at various time points from M-IL15-bearing animals, and T cells were analyzed for the natural killer group 2D receptor (NKG2D) expression. Mean  $\pm$  SEM percentages of NKG2D<sup>+</sup> cells among CD8<sup>+</sup> cells are shown. (C) *Rag*<sup>-/-</sup> $\gamma$ C<sup>-/-</sup> mice were injected s.c. with M-IL15 cells and received 2C or OT-1 splenocytes i.v. after 2 wk, along with anti-NKG2D antibody treatment. (Inset) FACS analysis showing NKG2D blockade with antibody.

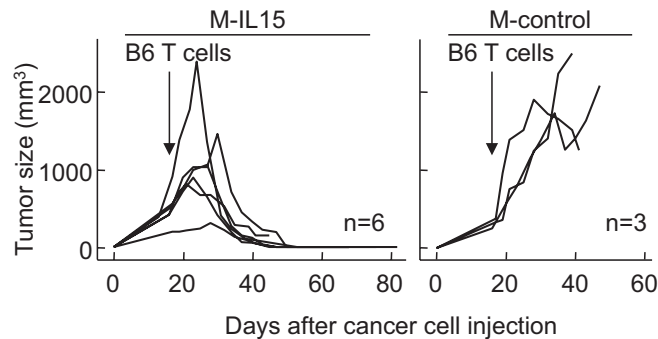

**Fig. 54.** Rapid IL-15-dependent eradication is also achieved by T cells with a WT T-cell receptor repertoire. *Rag*<sup>-/-</sup> $\gamma$ C<sup>-/-</sup> mice were injected s.c. with M-IL15 or M-control cells, followed 2 wk later by naïve B6 WT splenocytes i.v. Lines represent tumors of individual mice compiled from three individual experiments. Eradication of M-IL15 tumors (five of six mice) was statistically significant compared with continued growth of M-control (three of three mice;  $P < 0.05$ ).

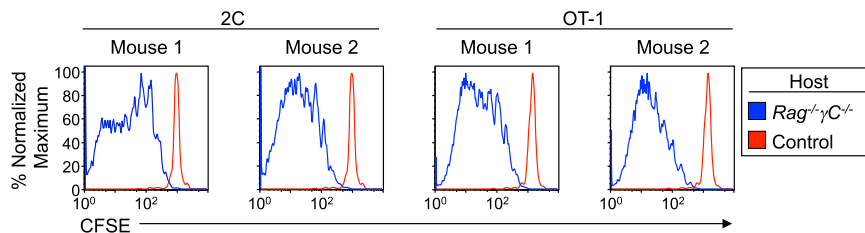

**Fig. 55.** 2C and OT-1 T cells proliferate similarly within 4 d after transfer into *Rag*<sup>-/-</sup> $\gamma$ C<sup>-/-</sup> hosts. Here  $1 \times 10^7$  splenocytes from 2C/*Rag*<sup>-/-</sup> and OT-1/*Rag*<sup>-/-</sup> mice were labeled with carboxyfluorescein succinimidyl ester (CFSE), mixed, and injected into two *Rag*<sup>-/-</sup> $\gamma$ C<sup>-/-</sup> recipients (blue; shown separately). Four days later, splenocytes from the recipient mice were stained with anti-CD8 and anti-V $\alpha$ 2 and evaluated by flow cytometry. 2C cells (Left) were gated on CD8<sup>+</sup>V $\alpha$ 2<sup>-</sup> cells, and OT-1 cells (Right) were gated on CD8<sup>+</sup>V $\alpha$ 2<sup>+</sup> cells. The labeled cells were also transferred into a control immunocompetent recipient (red); its carboxyfluorescein succinimidyl ester (CFSE)-positive cells are shown on each plot for comparison.

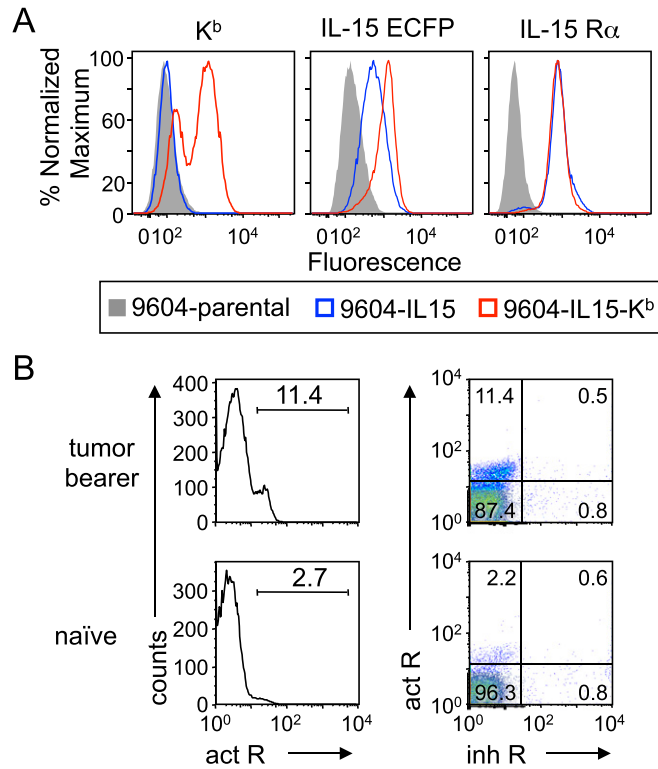

**Fig. S6.** IL-15 up-regulates activating NK receptors on T cells. (A) The 9604-parental, 9604-IL15, and 9604-IL15-K<sup>b</sup> cancer cell lines were analyzed for expression of the MHC class I molecule K<sup>b</sup>, IL-15 (enhanced cyan fluorescent protein, ECFP), and IL-15 receptor alpha (IL-15R $\alpha$ ) by flow cytometry. (B) Flow cytometry analysis of blood (CD8<sup>+</sup> T cells) from a K<sup>b-/-</sup> D<sup>b-/-</sup> mouse growing contralateral 9604-IL15 and 9604-IL15-K<sup>b</sup> tumors under administration of anti-NK1.1 antibody and treated with OT-1 splenocytes (tumor-bearer) and a naïve OT-1 mouse (naïve). T cells were analyzed for expression of activating natural killer (NK) receptors (act R: NKG2D, Ly-49D, and CD94) and inhibitory receptors (inh R: NKG2A, Ly-49A, and F). Plots of the tumor-bearer are representative of four individual mice.

**Table S1. MC57 and 9604 cell lines used in the present study**

| Designation              | Transgene 1 | Transgene 2      | Transgene 3    |
|--------------------------|-------------|------------------|----------------|
| M-SIY-IL15               | IL-15-ECFP  | SIY-EGFP         | -              |
| M-SIY                    | ECFP        | SIY-EGFP         | -              |
| M-IL15                   | IL-15-ECFP  | -                | -              |
| M-control                | ECFP        | -                | -              |
| M-parental               | -           | -                | -              |
| 9604-IL15-K <sup>b</sup> | IL-15-ECFP  | IL-15-R $\alpha$ | K <sup>b</sup> |
| 9604-IL15                | IL-15-ECFP  | IL-15-R $\alpha$ | -              |
| 9604-parental            | -           | -                | -              |
